# Supplementary material for: Synthesis and Properties of Tung Oil-Based Unsaturated Co-Ester Resins Bearing Steric Hindrance
Source: PubMed Central journal article supplement (PMC6572467; doi:10.3390/polym11050826), 2019-05-07
Supplement: polymers-11-00826-s001.pdf [file polymers-11-00826-s001.pdf]

## Supporting Information (SI)

# Synthesis and properties of tung oil-based unsaturated co-ester resins bearing steric hindrance

Chengguo Liu<sup>a,\*</sup>, Qiong Wu<sup>a,b</sup>, Rongrong An<sup>c</sup>, Qianqian Shang<sup>a</sup>, Guodong Feng<sup>a</sup>, Yun Hu<sup>a</sup>, Puyou Jia<sup>a</sup>, Yonghong Zhou<sup>a,\*</sup>, Wen Lei<sup>b,\*</sup>

<sup>a</sup> Institute of Chemical Industry of Forest Products, Chinese Academy of Forestry; National Engineering Lab for Biomass Chemical Utilization; Key Lab on Forest Chemical Engineering, State Forestry Administration; Key Lab of Biomass Energy and Material, Jiangsu Province; Nanjing 210042, P. R. China

<sup>b</sup> College of Science, Nanjing Forestry University, Nanjing 210037, P. R. China

<sup>c</sup> College of Geographic and Biologic Information, Nanjing University of Posts and Telecommunications, Nanjing 210023, P. R. China

\* Correspondence: **Corresponding authors:** Chengguo Liu. E-mail: liuchengguo@icifp.cn; Tel.: +86-25-85482520; Fax: +86-25-85482520; Yonghong Zhou. E-mail: zyh@icifp.cn; Tel.: +86-25-854825777; Fax: +86-25-854825777; Wen Lei. E-mail: njfuleiwen@163.com; Tel.: +86-25-85427206; Fax: +86-25-85427206.

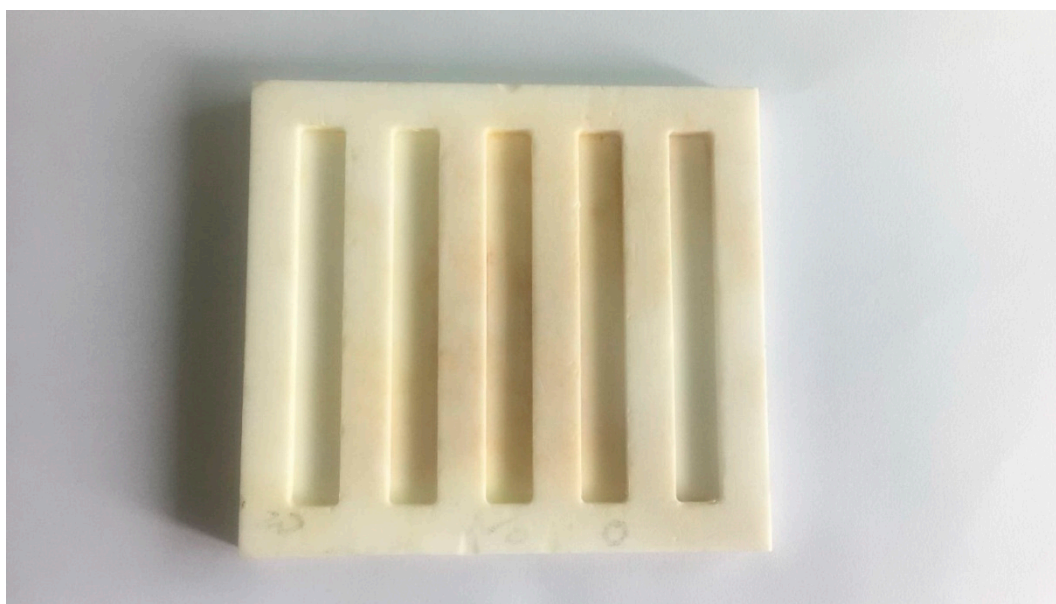

**Fig. S1** PTFE mold used for preparing samples of DMA test  
(Shape: Cuboid; Size: 80×10×4 mm<sup>3</sup>)

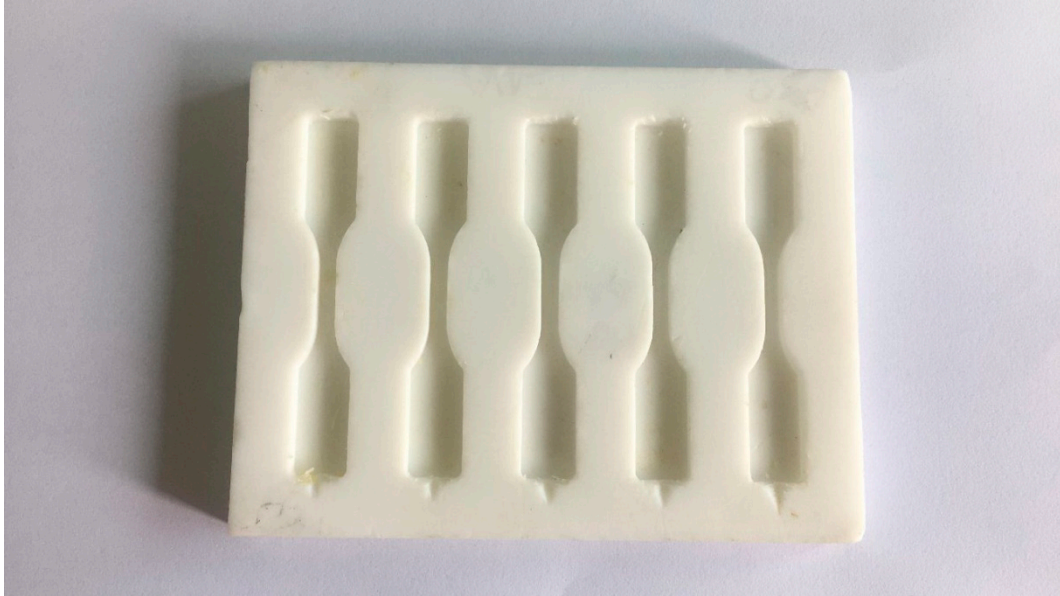

**Fig. S2** PTFE mold used for preparing samples of tensile property test  
(Shape: Dumbbell; Length overall: 63.5 mm; Width overall: 9.53 mm; Size of the  
narrow middle part:  $9.53 \times 3.18 \times 3.2 \text{ mm}^3$ )
